# Supplementary material
Source: PubMed Central journal article supplement (PMC6343480)

Targeted measurements of O- and N- glycopeptides show that proteins in HDL particles are enriched with specific glycosylation compared to plasma

Muchena J. Kailemia<sup>1</sup>, Wanghui Wei<sup>1</sup>, Khoa Nguyen<sup>1</sup>, Elizabeth Beals<sup>2</sup>, Lisa Sawrey-Kubicek<sup>2</sup>, Christopher Rhodes<sup>2</sup>, Chenghao Zhu<sup>2</sup>, Romina Sacchi<sup>2</sup>, Angela M. Zivkovic<sup>2,3</sup>, Carlito B. Lebrilla<sup>1,3</sup>

1. Department of Chemistry, University of California, Davis, California 95616, United States.
2. Department of Nutrition, University of California, Davis, California 95616, United States
3. Foods for Health Institute, University of California, Davis, California 95616, United States

Keywords:

HDL, Glycosylation, High density lipoprotein, Apo CIII, Fetuin A, Glycopeptides, UPLC, MRM, Tandem mass spectrometry

To whom correspondence should be addressed

Carlito B. Lebrilla

E-mail: [cblebrilla@ucdavis.edu](mailto:cblebrilla@ucdavis.edu).

Tel: 01-530-752-6465

Fax: 01-530-752-8995.

## Table of Contents

### 1. Supplementary Figure 1 S1

#### Supplementary Figure 1 S1

A typical fragmentation pattern of N-linked glycopeptides. Most of the fragments are associated with glycan portion of the glycopeptide with only a few peptide backbone fragments.

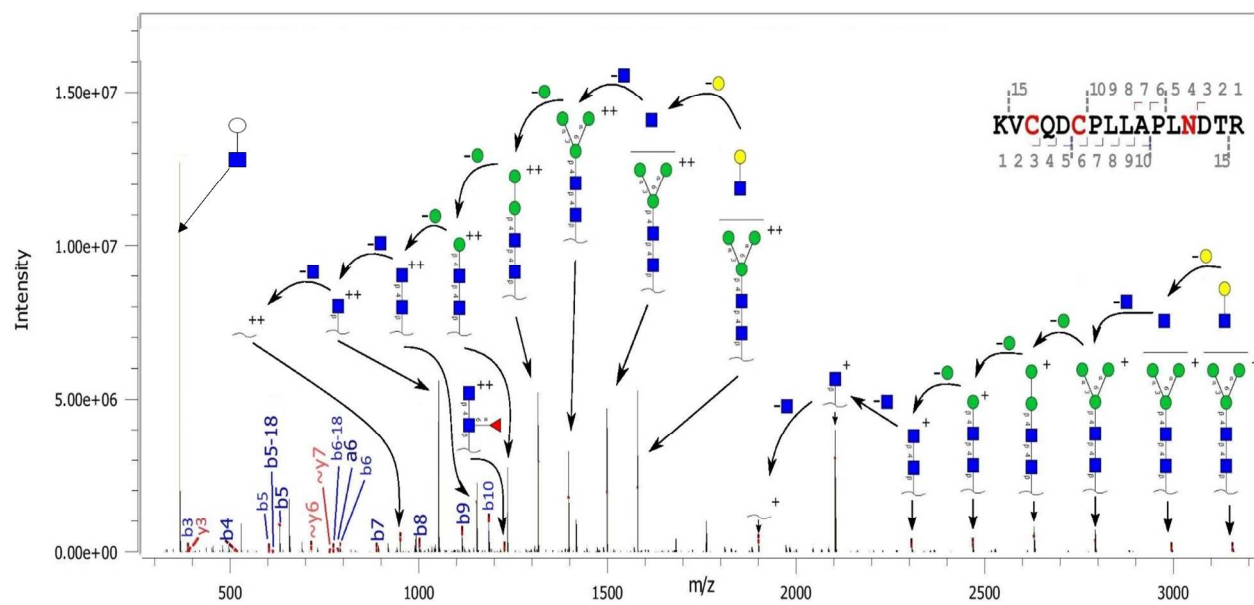

Supplement: NIHMS999979-supplement-Supplemental.pdf [file NIHMS999979-supplement-Supplemental.pdf]
